# Supplementary material for: Morphology and organization of tissue cells in 3D microenvironment of monodisperse foam scaffolds
Source: Royal Society of Chemistry journal article supplement (doi:10.1039/c1sm05371j), 2011-01-01
Supplement: c1sm05371j.pdf [file c1sm05371j.pdf]

**Descriptions of Supplementary Material for “Morphology and Organization of  
Tissue Cells in 3D Monodisperse Foam Scaffolds” (Manuscript ID  
SM-ART-03-2011-005371).**

**Supplementary Figures**

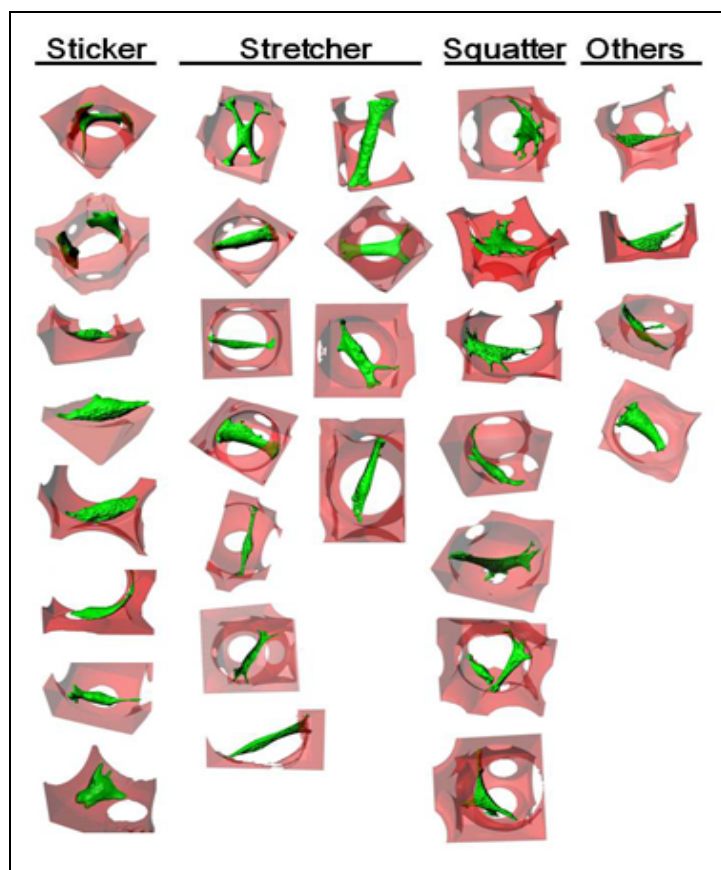

**Supplementary Fig. S1.** Fibroblast morphologies adopted after one day of culture in gelatin scaffolds with 60- $\mu\text{m}$  pores.

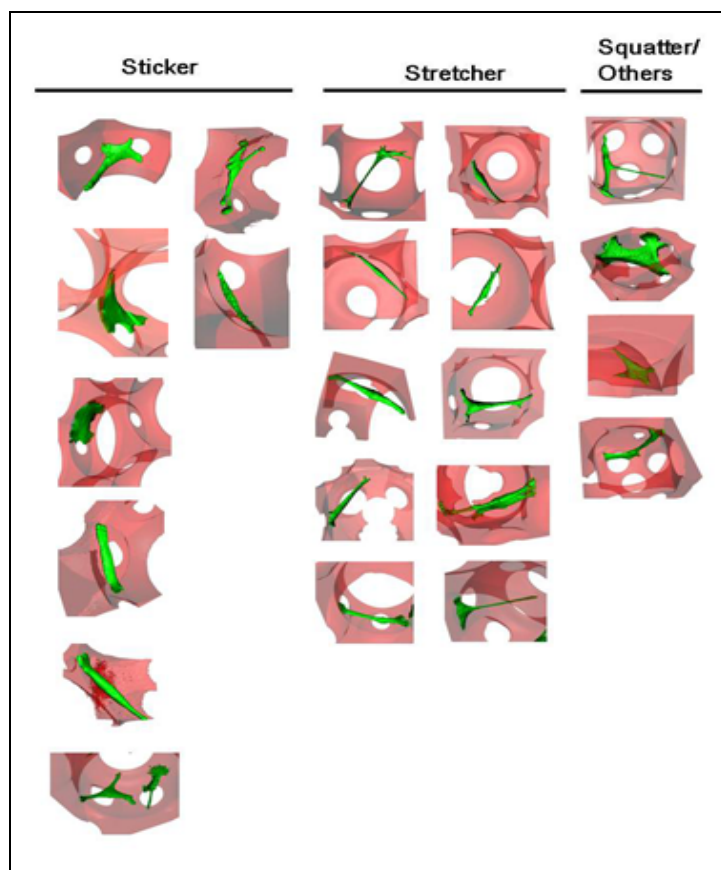

**Supplementary Fig. S2.** Fibroblast morphologies adopted after one day of culture in gelatin scaffolds with 120- $\mu\text{m}$  pores.

### **Supplementary Movies**

**Supplementary Movie S1.** Monodisperse bubbles are generated in a flow-focusing microfluidic device and self-organize into an ordered array of flowing lattice.

**Supplementary Movie S2.** A z-scan of polarized MDCK cells in a scaffold with pores of 70  $\mu\text{m}$  by confocal microscopy.

**Supplementary Movie S3.** Rendering movie (360°) of a sticker fibroblast spread across the wall of the spherical pore. This cell also appears in Fig. 5A.

**Supplementary Movie S4.** Rendering movie (360°) of a stretcher fibroblast straddling a scaffold pore. This cell also appears in Fig. 5B.

**Supplementary Movie S5.** Rendering movie (360°) of a squatter fibroblast lifting its body away from the pore wall by short pseudopodia. This cell also appears in Fig. 5C.

**Supplementary Movie S6.** A z-scan of the aster pattern constructed by C2C12 cells in a scaffold by confocal microscopy.
